# Supplementary material for: A multi-enzyme machine polymerizes the Haemophilus influenzae type b capsule
Source: PubMed Central journal article supplement (PMC10299916; doi:10.1038/s41589-023-01324-3), 2023-06-05

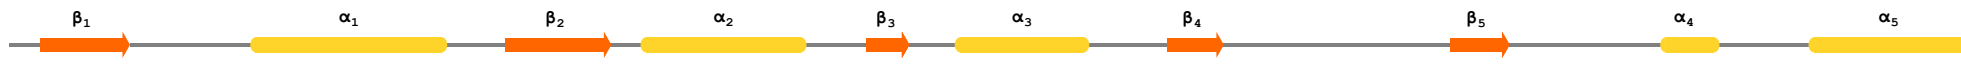

- **Haemophilus influenzae CroT**
- *Actinobacillus pleuropneumoniae B3GYR0*
- *Actinobacillus pleuropneumoniae AOA2SOETM3*
- *Bibersteinia trehalosi AOA4V7IBX4*
- *Bacillus subtilis TarK\_Q8RKJ1*
- *Staphylococcus aureus TarK\_Q2G1C2*
- *Bacillus subtilis TarL\_Q8RKJ2*
- *Staphylococcus aureus TarL\_Q2G1B8*
- *Bacillus subtilis TagF\_P13485*
- *Staphylococcus epidermidis TagF\_Q5HLM5*
- *Staphylococcus aureus TarF\_Q2G1C1*
- *Bacillus spizizenii TarF\_Q8RKI5*

```
1 VDKTWLFGSSYA---WGNPKALFLYMLVNCKETHECWWVADNEESMKS I K K S T G L K N I T F T D S E K A K E L F P H A D ---VYVTENFRESYPVYMNENIKVFNTW H G V G L K H I E L A L G M N S V L A E S I V R K Y V R
223 KEQTVLVYBSFSGQGMSCNPLALFLYLFNHNEYKNWTHIWIWINDT S N I P E E Y R K Y D -N V I F I R R G S D S Y L R Y L A T T K I L I N N S N F P P --Y F I R K P E Q K F L S T W H G T P F K T L G R D M E G R F F E H K N -----
187 DEKLVLIESFFGGNISCNPYAILSYMLENNY--DYTYVVVIKDGTVIPDNLFKFN- N I F I K R G S D A Y L R Y L C T A K Y L I N N V S F P Y --Y F I R K E G Q V Y L N T W H G T P M K T L G K D I K S P F M D H A N -----
187 NEKQVLIESFFGGNISCNPYAILLYMLDHNY--DFTYIVVVKPETVIPDSLKFKQ- N I F I N R G S D A Y L R Y L C T A K Y L I N N V S F P Y --Y F I R K A E Q I Y L N T W H G T P M K T L G K D I K S P F Q D H S N -----
27 QHDKVVIASREDQLSDNFRGVYEK L K Q D P S ---L R I T L L F R K M D K ---G L I G R -A A Y L L H L F C S L Y H L A T --C R V L L L D D Y Y F P L Y V V P K R K E T V A I Q L W H A C G A F K K -F G Y S I V N K P F G P S S D Y L K I
68 RSKTILFTSDSRPNLSGNFKYVYDELLRQK---VDFDYDIKTVFK---E N I T D -R R K W R D K F R L P Y L L G K --A D Y I F V D D F H P L I Y T V R F R P S Q E I I Q V W H A V G A F K T -V G F S R T G K K G G P F I D S L --
168 KSNKIVFASDSRLDVTGNFEFVYEELKRE---E N F D F --K F F L K ---S S I R D -R K S L S E L M S M A Y H F A T --S K I I F I D D F Y P I I Y P L K I R K N A D L V Q L W H A V G A F K T -F G Y S R I G L P G G P S P H S K --
117 KGNTVLFTSDSRPTMSGNF E Y I Y N E M L R Q N ---L D K K Y D I H T V F K ---A N I T D -R R G I D K F R L P Y L L G K --A D Y I F V D D F H P L I Y T V R F R S Q E V I Q V W H A V G A F K T -V G F S R T G K K G G P F I D S L --
113 KRKTIVIFESFNGKQYSCNPRAIY E Y M R E N H P --E Y K M Y W S V N K Q Y S ---A P F D E K G I P Y I N R L S L K W L F A M A R A E Y W V V N S R L P L --W I P K P S H T Y L Q T W H G T P L K R L A M D M E E V H M P G T N T K K Y K R N
91 KPKTIVFESFGGKNYS D S P K Y I Y E Y M Q K Y Y P --N Y R Y I W S F K N P D K ---N V V P G -S A E K V K R N S A E Y Y Q A Y S E A S H W V S N A R T P L --Y L N K K E N Q T Y I Q T W H G T P L K R L A M D M K V V R M P G T T T P K Y K R N
26 NKNLIYFESFHGKQYSDNPKALY E Y L T E H -S --D A Q L I W G V K K G Y E ---H I F Q Q H N V P Y V T K F S M K W F L A M P R A K A W M I N T R T P D --W L Y K S P R T T Y L Q T W H G T P L K K I G L D I S N V K M L G T N T Q N Y Q D G
30 NEKLIIFESYSYGKQFS CNPRAI F E Y L E E N K D K Y D Y Q L I W S I D K R N K ---D L F D N S D V N Y L R R F S L K W L W Y M A T A K Y W V T N S R L P L --W I P K P R N T T Y V Q T W H G T P L K K L A M D M D E V H M P G T T T E Q Y K R N
```

Consensus

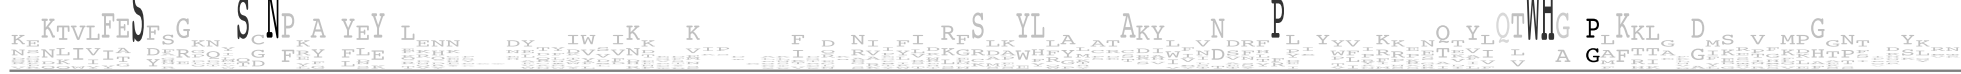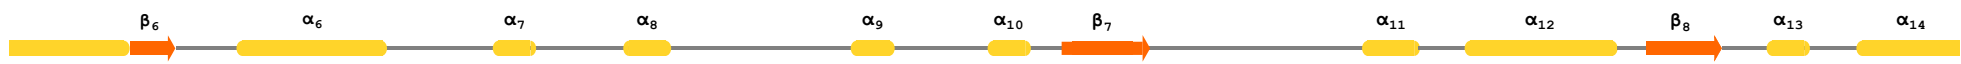

- **Haemophilus influenzae CroT**
- *Actinobacillus pleuropneumoniae B3GYR0*
- *Actinobacillus pleuropneumoniae AOA2SOETM3*
- *Bibersteinia trehalosi AOA4V7IBX4*
- *Bacillus subtilis TarK\_Q8RKJ1*
- *Staphylococcus aureus TarK\_Q2G1C2*
- *Bacillus subtilis TarL\_Q8RKJ2*
- *Staphylococcus aureus TarL\_Q2G1B8*
- *Bacillus subtilis TagF\_P13485*
- *Staphylococcus epidermidis TagF\_Q5HLM5*
- *Staphylococcus aureus TarF\_Q2G1C1*
- *Bacillus spizizenii TarF\_Q8RKI5*

```
125 NYDIYKNNVLFLLTTSQAMEDHFL E D M A I S ---K E L I I R G K Y P R N A V Y G P N G I H T Y D I N T L L P K -N K S Q Y S O T I L F C P T Y R ---I G A I Q G V L N S L L P D F A K L E E V C R H K N Q L F I V K V P F P M K K D N Y F A E M S
343 LTRNIFQSTHLLSPNAHTSKILYERHDIKEIYTGR L I E S C Y P R I D M T L S L --A K E E K I E L R E K L G V L N N E K L V F Y A P T W R G I H G D I E F D -Y E K L Q S D L N K L S K L ---E G A K V V F R G S L L Q E A ----L S
305 VSRNFLQATHIISP NRHTTDVILEQYDVKDLFSGKLAETG Y P R I D L S F N L --T D K R R N E I A E K L G F S N N K P V V F Y A P T W R G T S Q S K D F D -T S K L Q Y D L R K L K S ----N K Y N L I F R G S H L V E Q L ----L E
305 VSRNFLQATHLISP NRHTTDIMLEKYDIKDLFSGEI A E T G Y P R I D L S F L S ---E E R R N E I R K K L G F K N N K P V V F Y A P T W R G T S Q S K D F D -T Q K L Q N D L K R L K S ----D K Y N L V F R G S H L V E S L ----L S
146 -VPVHSNYDYAIVSAPA A V P H F A E A F Q M E ---E K Q I L P L C I P R T D Y F Y H K E H I R T V L D E F H Q A Y P E L K H K K K L L Y A P T F R G S G H H Q E G D -A T P --I D L L Q L K S A L H H K D Y V V M L H L P Y M R K H ----A H
184 ---NHRSYTKAYVSSETDIPFYAEAFGIR---E E N V V P T G V P R T D V L F D E A Y A T Q I K Q E M E D E L P I I K G K K V I L F A P T F R G N G H G T A H Y P F F K --I D F E R L A R Y C E K H N A V V L F K M P F V K N R ----L N
282 ---NHRNYTKVIVSSENIRKH Y A E G F G V D ---I E N V I A T G V P R T D F F F D E A K K A F V K E R L Y T E Y P F L K D K K V I L F A P T F R G N G Q S A H Y P F E V --I D F D R L Y R E L K -D E Y I F L F K I P F V R N D ----A N
233 ---NHRSYTKAYVSSETDIPFYAEAFGIR---E K N V V P T G V P R T D V L F D E A Y A T Q I K Q E M E D E L P I I K G K K V I L F A P T F R G S G H G T A H Y P F F K --I D F E R L A R Y C E K H N A V V L F K M P F V K N R ----L N
235 F I K E A S N W D Y L I S P N Y S T E I F T R A F Q F N ---K -T M I E S Y P R N D F L H N -D N N E E T I S L I K S R L N I P R D K K V I L Y A P T W R D D Q F Y A K G R Y K F D L D L D L H Q L R Q E L G -N E Y I V I L R M Y L V A E N ----F D
212 F N R E T S R W D Y L I S P N R Y S T E I F R S A F W M D ---E E R I L E T G Y P R N D V L V N R A N D Q E Y L D E I R T H L N L P S D K K V I M Y A P T W R D D E F V S K G Y L F E L K I D L D N L Y K E L G -D D Y V I L L R M Y L I S N A ----L D
147 F K K E S Q R W D Y L V S P N P Y S T S I F Q N A F H V S ---R D K I L E T G Y P R N D K L S H K R N D T E Y I N G I K T R L N I P L D K K V I M Y A P T W R D D E A I R E G S Y Q F N V N F D I E A L R Q A L D -D D Y V I L L R M Y L V V T R ----I D
154 F L K E A S K W D Y L I S P N A Y S T E I F R S A F Q F K ---K -T F I E S C Y P R N D F L H K -K N R N E E M L K I K E R L G I N K D K K I I L Y A P T W R D N S F Y A K G K Y K F N M V L D L E S L K N Q L C -N E Y I L I L R M Y L V S E N ----I N
```

Consensus

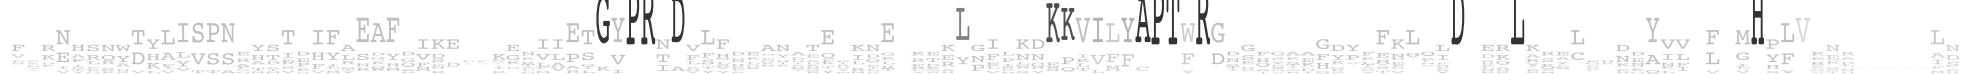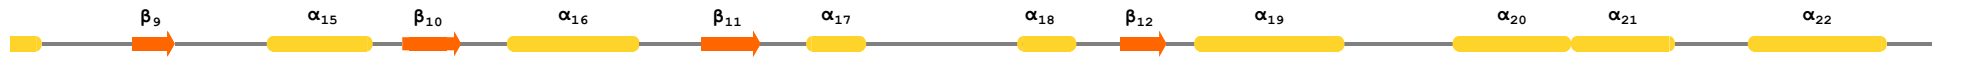

- **Haemophilus influenzae CroT**
- *Actinobacillus pleuropneumoniae B3GYR0*
- *Actinobacillus pleuropneumoniae AOA2SOETM3*
- *Bibersteinia trehalosi AOA4V7IBX4*
- *Bacillus subtilis TarK\_Q8RKJ1*
- *Staphylococcus aureus TarK\_Q2G1C2*
- *Bacillus subtilis TarL\_Q8RKJ2*
- *Staphylococcus aureus TarL\_Q2G1B8*
- *Bacillus subtilis TagF\_P13485*
- *Staphylococcus epidermidis TagF\_Q5HLM5*
- *Staphylococcus aureus TarF\_Q2G1C1*
- *Bacillus spizizenii TarF\_Q8RKI5*

```
248 EKYKDSEYILFWNDYDIYEAFNSIDLAIIDYSSIF Y D L L D A G V E K F I R Y V P D L D E Y Q N D L E -L I G D Y A D L T E G R I V K S F Q L L N C L D N A N I K I I S T K R K Q Y L M D Y F F G F K K E N K S M E S L I A D V D N C Q
462 ---KINLGITVVPDELDTNKILSVTDLITDYSSV L F D Y L -P T L K P L V L Y M Y D I K E Y T E -E R G L Y F S -E N E L P G E K C Y N I N E L V K T L T Y L L E N N I T S V S F E D S K V A Q F A P H D D C N V S E K V I N A L F G Y L
423 ---TINLDVTVPAPKDIDS N E L L G F C D L L I T D Y S S I I Y D F L -A L S K P A I S Y I Y D Y E E Y D A -E R G L Y L K -P T E M S G T V C T T I T D V K K T I L E H I S S G K S N V --S E Q D I Q K Y S Y L D D C A T K R T V E F M L G T L
422 ---EIKLDVVVAPKEIDS N E L L G Y C D L L I T D Y S S I I Y D F L -A L N K P V I S Y V Y D F D E Y K E -E R G L Y F E -K D E M V G A V C S T I S E V R Q A I L E N L N K N K S N V --L E R D I E K Y S Y L D D C R A T O R T V D F I F G L L
264 T--EEDDFVLDLTD S Y S L Y D L M A I S D G L I T D Y S S V I F E Y S -L L K R P M Y F Y C P D L E D Y L K -E R D F Y Y P F E S F V P G P I S K D V P S L V H D I E S D H E A D ---T K R I E A F S Q T Y I T H Q D C K S S E R V A D F I S ---
301 ISREHRQYFIDVSDHREVNDILFVTDL L I S D Y S S L I Y E Y A -V F K K P M I F Y A F D L E D Y I T -T R D F Y E P F E S F V P G K I V Q S F D A L M D A L D N E -D Y E ---V E K V V P F L D K H F K Y Q D G R S S E R L V K D L F ---
398 IPYQYSDFYDFSSFREIN E L L L V T D V L I T D Y S S V C F E Y A -L L N K P M I F F S Y D V D D Y I R -K R D F Y Y D Y D F I P G P L A K T S D Q M I S I I K E E -K Y N ---F E Q I D S F V H Y F F D D L D G K A S E R V V D Q I V ---
350 IADKHQYFVDVSDFREVDILFITDL L I S D Y S S L I Y E Y A -V F K K P M I F Y A F D L E D Y I T -T R D F Y E P Y E S F V P G K I V Q S F D A L M D A L D N E -D Y E ---G E K V I P F L D K H F K Y Q D G R S S E R L V R N L F ---
354 L G -P F E G F A Y D F S A Y E D I R E L Y M V S D L L I T D Y S S V F F D F A -N L K R P M L F F V P D I E T Y R D K L R G F Y F D F E K E A P G P L V K T T E E T I E A I K Q I S S P D Y K L P V S F G P F Y D K F C Y L E S G R S S E K V V N T V F ---
333 L S -G Y E N F A I D V S N Y N D V S E L F L I S D C L I T D Y S S V M F D Y G -I L K R P Q F F F A Y D I D K Y D K G L R G F Y M N Y M E D L P G P I Y T E P Y G L A K E L K N L D K V Q Q Y Q E K I D A F Y D R F C S V D N K A S Q Y I G D L I H ---
268 ---E H D D F V K D V S D Y E D I S D L Y L I S D A L V T D Y S S V M F D F G -V L K R P Q I F Y A Y D L D K Y G D E L R G F Y M D Y K K E L P G P I V E N Q T A L I D A L K Q I D E T A N E Y I E A R T V F Y Q K F C S L E D C Q A S Q R I C Q T I F ---
273 L T -E Y K E F A Y D F S D H N D I R E L Y L I S D L I T D Y S S V F F D F A -G L K R P I L F Y V P D I E F Y R D N L R G F Y Y D F E K A P G P L L K T T E K V I E A I H K T --K N Y Q D E N I T S F Y D Q F C Y L E K G D S S K K V V E E L L ---
```

Consensus

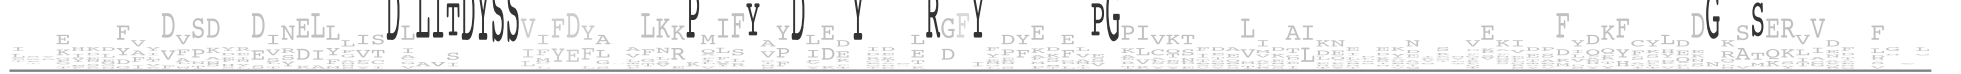

Supplement: 41589_2023_1324_MOESM4_ESM.pdf [file 41589_2023_1324_MOESM4_ESM.pdf]
