# Supplementary material for: A multi-enzyme machine polymerizes the Haemophilus influenzae type b capsule
Source: PubMed Central journal article supplement (PMC10299916; doi:10.1038/s41589-023-01324-3), 2023-06-05
Supplement: 41589_2023_1324_MOESM2_ESM.pdf [file 41589_2023_1324_MOESM2_ESM.pdf]

## Reporting Summary

Nature Portfolio wishes to improve the reproducibility of the work that we publish. This form provides structure for consistency and transparency in reporting. For further information on Nature Portfolio policies, see our [Editorial Policies](#) and the [Editorial Policy Checklist](#).

### Statistics

For all statistical analyses, confirm that the following items are present in the figure legend, table legend, main text, or Methods section.

n/a Confirmed

- The exact sample size ( $n$ ) for each experimental group/condition, given as a discrete number and unit of measurement
- A statement on whether measurements were taken from distinct samples or whether the same sample was measured repeatedly
- The statistical test(s) used AND whether they are one- or two-sided  
*Only common tests should be described solely by name; describe more complex techniques in the Methods section.*
- A description of all covariates tested
- A description of any assumptions or corrections, such as tests of normality and adjustment for multiple comparisons
- A full description of the statistical parameters including central tendency (e.g. means) or other basic estimates (e.g. regression coefficient) AND variation (e.g. standard deviation) or associated estimates of uncertainty (e.g. confidence intervals)
- For null hypothesis testing, the test statistic (e.g.  $F$ ,  $t$ ,  $r$ ) with confidence intervals, effect sizes, degrees of freedom and  $P$  value noted  
*Give  $P$  values as exact values whenever suitable.*
- For Bayesian analysis, information on the choice of priors and Markov chain Monte Carlo settings
- For hierarchical and complex designs, identification of the appropriate level for tests and full reporting of outcomes
- Estimates of effect sizes (e.g. Cohen's  $d$ , Pearson's  $r$ ), indicating how they were calculated

*Our web collection on [statistics for biologists](#) contains articles on many of the points above.*

### Software and code

Policy information about [availability of computer code](#)

#### Data collection

We did not generate any new software for our work. Data collection software includes:  
 - NMR: Data were collected with Topspin 3.6.1 (Bruker Biospin, Germany)  
 - HPLC: Data were collected with LCsolution version 1.25 SP4 (Shimadzu)  
 - Gels were scanned using Amersham Imager 680, Software: AI600\_66830510 Version2.0.0

#### Data analysis

We did not generate any new software for our work. Data analysis software includes:  
 - NMR: Spectra were processed with Topspin 3.6.1 (Bruker Biospin, Germany) and analyzed with Sparky 3.115 and 3.111 (Goddard T.D., Kneller D.G. (2008) SPARKY 3. University of California, San Francisco, CA).  
 HPLC: Data analysis was performed with LCsolution version 1.25 SP4 (Shimadzu).  
 Nucleotide and protein sequences were identified with the BLAST suite of programs from the National Center for Biotechnology Information (NCBI).  
 phenix-1.18.2-3874  
 coot 0.8.9.2  
 UCSF Chimera 1.14  
 UCSF ChimeraX 1.3  
 Phaser 2.5  
 Buccaneer 1.0  
 CCP4 1.18.2  
 Refmac5  
 MolProbity Online Version 4.4 available at <http://molprobity.biochem.duke.edu/>  
 Hollow 1.1

PISA, Web service available at <https://www.ebi.ac.uk/pdbe/pisa/>

MUSCLE version 3.8.31

Cobalt, a constraint-based multiple sequence alignment tool from the National Center for Biotechnology Information (NCBI), National Institutes of Health (NIH) available at <https://www.ncbi.nlm.nih.gov/tools/cobalt/cobalt.cgi?CMD=Web>

Clustal Omega, Online Version, available at <https://www.ebi.ac.uk/Tools/msa/clustalo/>

DALI server, a network service for comparing protein structures in 3D available at <http://ekhidna2.biocenter.helsinki.fi/dali>.

Alphafold, web service available at <https://colab.research.google.com/github/sokrypton/ColabFold/blob/main/AlphaFold2.ipynb>

For manuscripts utilizing custom algorithms or software that are central to the research but not yet described in published literature, software must be made available to editors and reviewers. We strongly encourage code deposition in a community repository (e.g. GitHub). See the Nature Portfolio [guidelines for submitting code & software](#) for further information.

## Data

Policy information about [availability of data](#)

All manuscripts must include a [data availability statement](#). This statement should provide the following information, where applicable:

- Accession codes, unique identifiers, or web links for publicly available datasets
- A description of any restrictions on data availability
- For clinical datasets or third party data, please ensure that the statement adheres to our [policy](#)

The atomic coordinates and structure factors have been deposited in the Protein Data Bank, accession codes 8A0C for the Bcs3-CMP complex and 8A0M for the Bcs3-DP2 complex. Data collection and refinement statistics are presented in Supplementary Table 3. PDB IDs used in the analysis of this work include 1ZN7, 1LHO, 1FSG, 1JLS, 1L7N, 5AES, 3VAY, 1L7P, 3L7K, 4ZHT, 6JDT, 4X1T, 5LEO, 6RJE, 1R77, 7BNH and 7SHG. Accession codes for sequences used in this study are available in Supplementary Table 4 and Extended Data Figure 1. NMR chemical shifts are presented in Supplementary Tables 1 and 2. Source Data is provided in separate files.

## Human research participants

Policy information about [studies involving human research participants and Sex and Gender in Research](#).

Reporting on sex and gender

Population characteristics

Recruitment

Ethics oversight

Note that full information on the approval of the study protocol must also be provided in the manuscript.

## Field-specific reporting

Please select the one below that is the best fit for your research. If you are not sure, read the appropriate sections before making your selection.

Life sciences  Behavioural & social sciences  Ecological, evolutionary & environmental sciences

For a reference copy of the document with all sections, see [nature.com/documents/nr-reporting-summary-flat.pdf](https://nature.com/documents/nr-reporting-summary-flat.pdf)

## Life sciences study design

All studies must disclose on these points even when the disclosure is negative.

Sample size

Data exclusions

Replication

## Randomization

Randomization was not necessary as no allocation of samples into experimental groups was required. In our experimental set up, defined enzyme variants were compared under well controlled conditions. Accordingly, the assays performed in this study did not depend on statistical analyses of an unknown relationship, but required a rational approach for activity comparison.

## Blinding

Blinding was not relevant because results did not require subjective judgment or interpretation.

## Reporting for specific materials, systems and methods

We require information from authors about some types of materials, experimental systems and methods used in many studies. Here, indicate whether each material, system or method listed is relevant to your study. If you are not sure if a list item applies to your research, read the appropriate section before selecting a response.

### Materials & experimental systems

| n/a                                 | Involved in the study                                  |
|-------------------------------------|--------------------------------------------------------|
| <input type="checkbox"/>            | <input checked="" type="checkbox"/> Antibodies         |
| <input checked="" type="checkbox"/> | <input type="checkbox"/> Eukaryotic cell lines         |
| <input checked="" type="checkbox"/> | <input type="checkbox"/> Palaeontology and archaeology |
| <input checked="" type="checkbox"/> | <input type="checkbox"/> Animals and other organisms   |
| <input checked="" type="checkbox"/> | <input type="checkbox"/> Clinical data                 |
| <input checked="" type="checkbox"/> | <input type="checkbox"/> Dual use research of concern  |

### Methods

| n/a                                 | Involved in the study                           |
|-------------------------------------|-------------------------------------------------|
| <input checked="" type="checkbox"/> | <input type="checkbox"/> ChIP-seq               |
| <input checked="" type="checkbox"/> | <input type="checkbox"/> Flow cytometry         |
| <input checked="" type="checkbox"/> | <input type="checkbox"/> MRI-based neuroimaging |

## Antibodies

## Antibodies used

rabbit anti-Hib agglutinating serum (Remel™/Thermo Fisher Scientific; in 1:1,000 or 1:2,000 dilution)

## Validation

The agglutinating serum was used according to the manufacturer's guidelines. Specificity to Hib polymer was investigated by performing appropriate controls. NMR characterization unambiguously confirmed the identity of the polymer.
