# Supplementary material for: A multi-enzyme machine polymerizes the Haemophilus influenzae type b capsule
Source: PubMed Central journal article supplement (PMC10299916; doi:10.1038/s41589-023-01324-3), 2023-06-05
Supplement: 41589_2023_1324_MOESM3_ESM.pdf [file 41589_2023_1324_MOESM3_ESM.pdf]

Genomic map showing domains  $\beta_1$  through  $\beta_6$  and  $\alpha_1$  through  $\alpha_6$ . Sequence alignment for *Haemophilus influenzae* Q2ERG0, *Escherichia coli* STP42972.1, *Wielierella bovis* ULJ69903.1, *Psychobacter* sp. WP\_192991736.1, *Pasteurella bettyae* WP\_005760985.1, and *Acinetobacter* sp. OAL82787.1. Consensus sequence is shown below.

Genomic map showing domains  $\alpha_7$  through  $\alpha_{18}$ . Sequence alignment for *Haemophilus influenzae* Q2ERG0, *Escherichia coli* STP42972.1, *Wielierella bovis* ULJ69903.1, *Psychobacter* sp. WP\_192991736.1, *Pasteurella bettyae* WP\_005760985.1, and *Acinetobacter* sp. OAL82787.1. Consensus sequence is shown below.

Genomic map showing domains  $\beta_7$  through  $\beta_{11}$  and  $\alpha_9$  through  $\alpha_{17}$ . Sequence alignment for *Haemophilus influenzae* Q2ERG0, *Escherichia coli* STP42972.1, *Wielierella bovis* ULJ69903.1, *Psychobacter* sp. WP\_192991736.1, *Pasteurella bettyae* WP\_005760985.1, and *Acinetobacter* sp. OAL82787.1. Consensus sequence is shown below.

Genomic map showing domains  $\beta_{12}$  through  $\beta_{14}$  and  $\alpha_{19}$  through  $\alpha_{27}$ . Sequence alignment for *Haemophilus influenzae* Q2ERG0, *Escherichia coli* STP42972.1, *Wielierella bovis* ULJ69903.1, *Psychobacter* sp. WP\_192991736.1, *Pasteurella bettyae* WP\_005760985.1, and *Acinetobacter* sp. OAL82787.1. Consensus sequence is shown below.

Genomic map showing domains  $\beta_{15}$  through  $\beta_{19}$  and  $\alpha_{28}$  through  $\alpha_{36}$ . Sequence alignment for *Haemophilus influenzae* Q2ERG0, *Escherichia coli* STP42972.1, *Wielierella bovis* ULJ69903.1, *Psychobacter* sp. WP\_192991736.1, *Pasteurella bettyae* WP\_005760985.1, and *Acinetobacter* sp. OAL82787.1. Consensus sequence is shown below.

Genomic map showing domains  $\beta_{20}$  through  $\beta_{22}$  and  $\alpha_{37}$  through  $\alpha_{44}$ . Sequence alignment for *Haemophilus influenzae* Q2ERG0, *Escherichia coli* STP42972.1, *Wielierella bovis* ULJ69903.1, *Psychobacter* sp. WP\_192991736.1, *Pasteurella bettyae* WP\_005760985.1, and *Acinetobacter* sp. OAL82787.1. Consensus sequence is shown below.

Genomic map showing domains  $\beta_{23}$  through  $\beta_{26}$  and  $\alpha_{45}$  through  $\alpha_{50}$ . Sequence alignment for *Haemophilus influenzae* Q2ERG0, *Escherichia coli* STP42972.1, *Wielierella bovis* ULJ69903.1, *Psychobacter* sp. WP\_192991736.1, *Pasteurella bettyae* WP\_005760985.1, and *Acinetobacter* sp. OAL82787.1. Consensus sequence is shown below.

Genomic map showing domains  $\alpha_{51}$  through  $\alpha_{59}$ . Sequence alignment for *Haemophilus influenzae* Q2ERG0, *Escherichia coli* STP42972.1, *Wielierella bovis* ULJ69903.1, *Psychobacter* sp. WP\_192991736.1, *Pasteurella bettyae* WP\_005760985.1, and *Acinetobacter* sp. OAL82787.1. Consensus sequence is shown below.

Genomic map showing domains  $\alpha_{56}$  through  $\alpha_{59}$ . Sequence alignment for *Haemophilus influenzae* Q2ERG0, *Escherichia coli* STP42972.1, *Wielierella bovis* ULJ69903.1, *Psychobacter* sp. WP\_192991736.1, *Pasteurella bettyae* WP\_005760985.1, and *Acinetobacter* sp. OAL82787.1. Consensus sequence is shown below.
