# Supplementary material for: A multi-enzyme machine polymerizes the Haemophilus influenzae type b capsule
Source: PubMed Central journal article supplement (PMC10299916; doi:10.1038/s41589-023-01324-3), 2023-06-05

Haemophilus influenzae\_Q2ERGO  
Escherichia\_coli\_STP42972.1  
Escherichia\_coli\_STI11141.1  
Escherichia\_coli\_STI11142.1

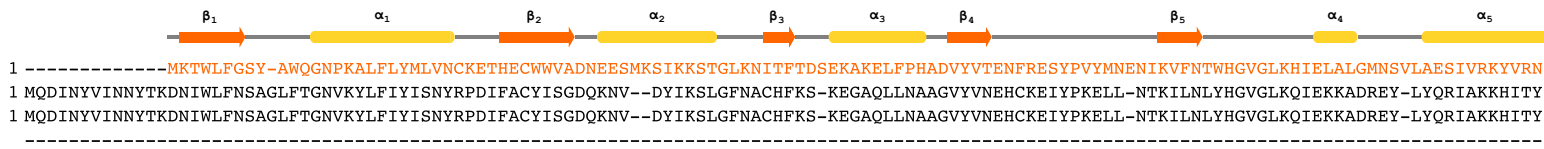

Haemophilus influenzae\_Q2ERGO  
Escherichia\_coli\_STP42972.1  
Escherichia\_coli\_STI11141.1  
Escherichia\_coli\_STI11142.1

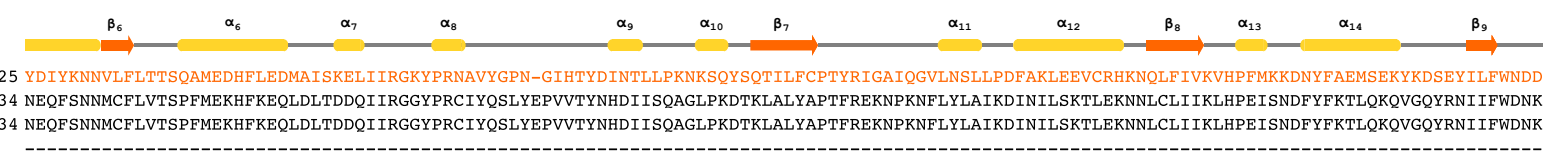

Haemophilus influenzae\_Q2ERGO  
Escherichia\_coli\_STP42972.1  
Escherichia\_coli\_STI11141.1  
Escherichia\_coli\_STI11142.1

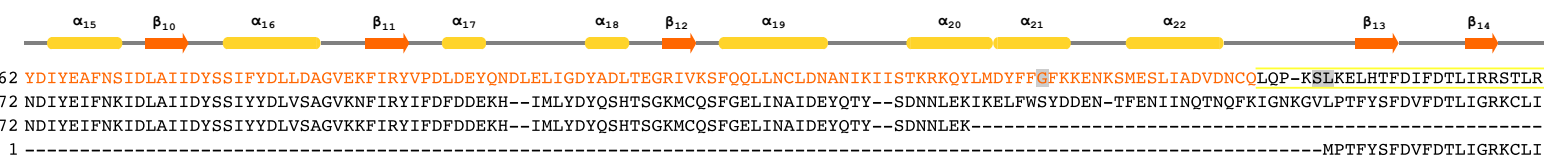

Haemophilus influenzae\_Q2ERGO  
Escherichia\_coli\_STP42972.1  
Escherichia\_coli\_STI11141.1  
Escherichia\_coli\_STI11142.1

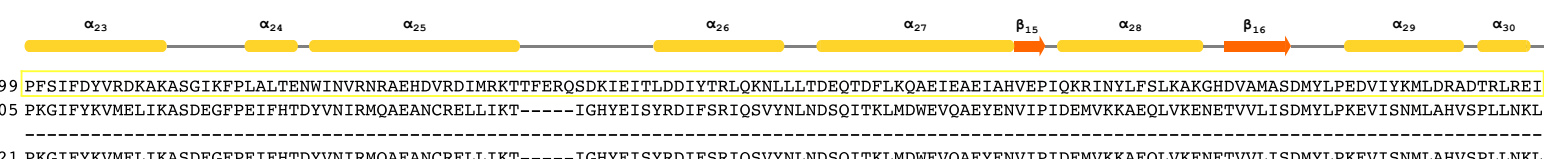

Haemophilus influenzae\_Q2ERGO  
Escherichia\_coli\_STP42972.1  
Escherichia\_coli\_STI11141.1  
Escherichia\_coli\_STI11142.1

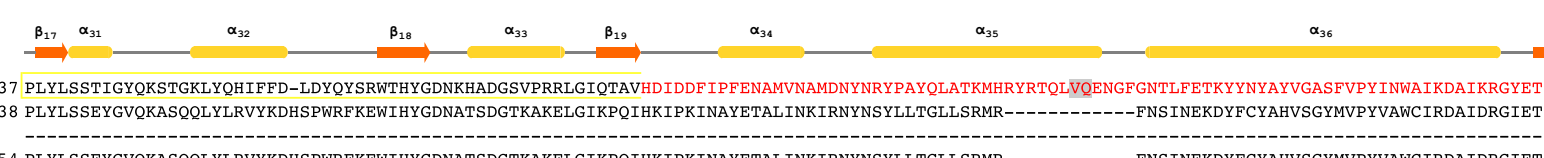

Haemophilus influenzae\_Q2ERGO  
Escherichia\_coli\_STP42972.1  
Escherichia\_coli\_STI11141.1  
Escherichia\_coli\_STI11142.1

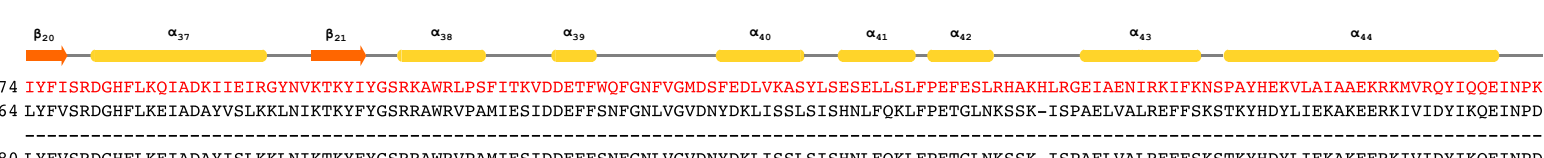

Haemophilus influenzae\_Q2ERGO  
Escherichia\_coli\_STP42972.1  
Escherichia\_coli\_STI11141.1  
Escherichia\_coli\_STI11142.1

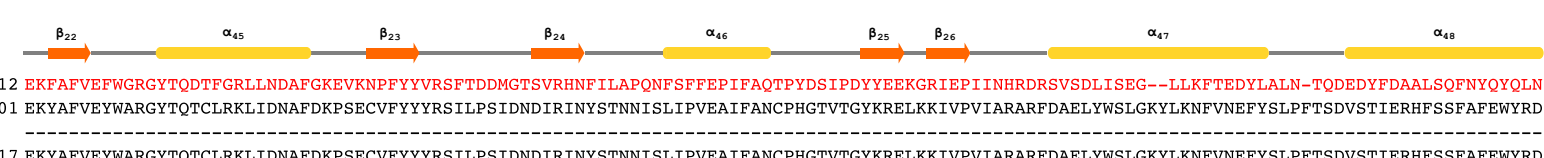

Haemophilus influenzae\_Q2ERGO  
Escherichia\_coli\_STP42972.1  
Escherichia\_coli\_STI11141.1  
Escherichia\_coli\_STI11142.1

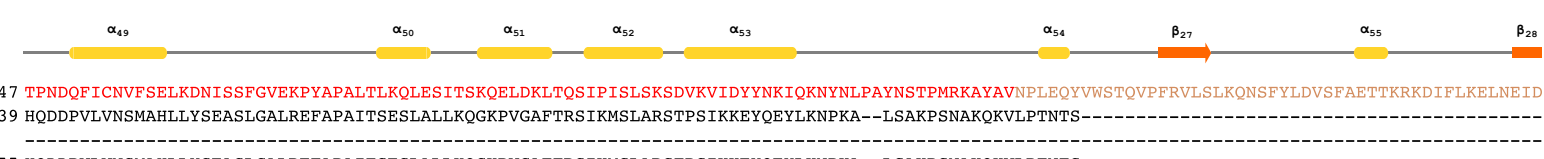

Haemophilus influenzae\_Q2ERGO  
Escherichia\_coli\_STP42972.1  
Escherichia\_coli\_STI11141.1  
Escherichia\_coli\_STI11142.1

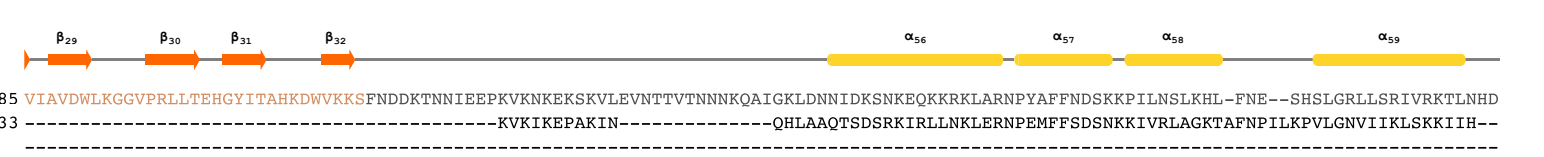

Supplement: 41589_2023_1324_MOESM5_ESM.pdf [file 41589_2023_1324_MOESM5_ESM.pdf]
