# Supplementary material for: A multi-enzyme machine polymerizes the Haemophilus influenzae type b capsule
Source: PubMed Central journal article supplement (PMC10299916; doi:10.1038/s41589-023-01324-3), 2023-06-05

Figure 3c  
colors were adjusted equally across the entire image to improve the visualization of Alcian blue

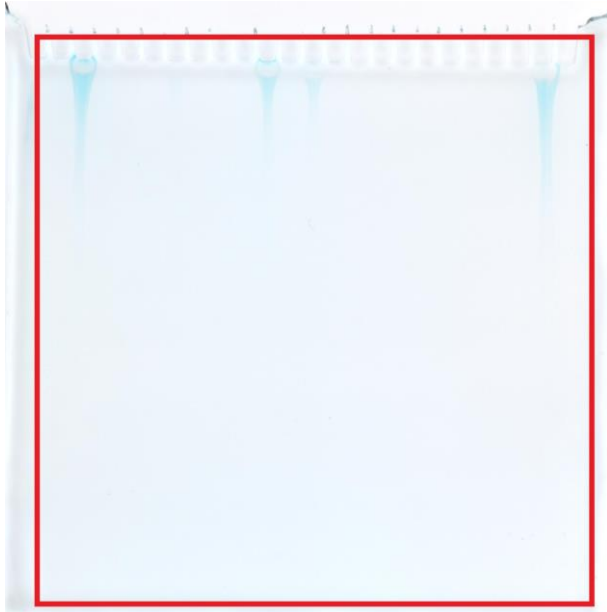

Figure 3d  
colors were adjusted equally across the entire image to improve the visualization of Alcian blue

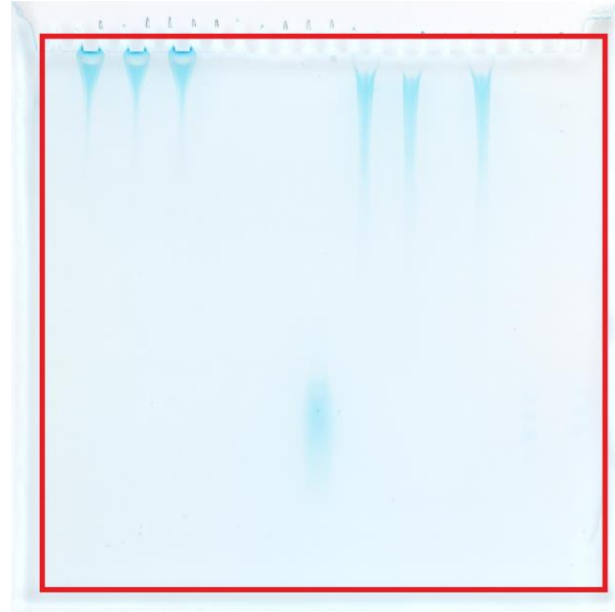

Figure 3e  
colors were adjusted equally across the entire image to improve the visualization of Alcian blue

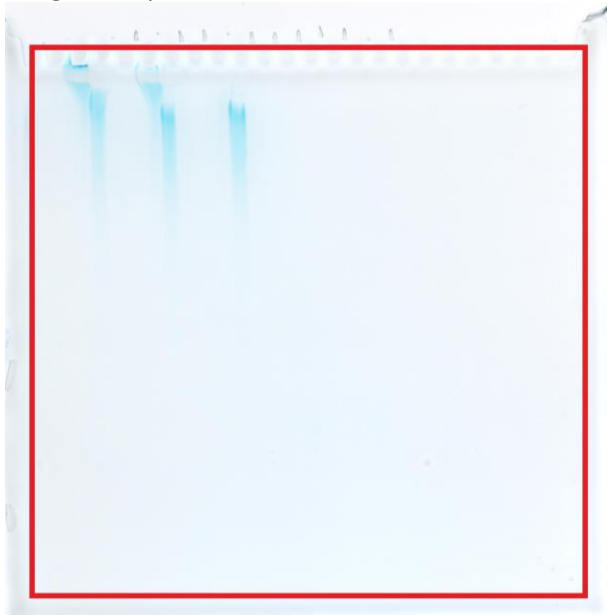

Figure 3f  
colors were adjusted equally across the entire image to improve the visualization of Alcian blue

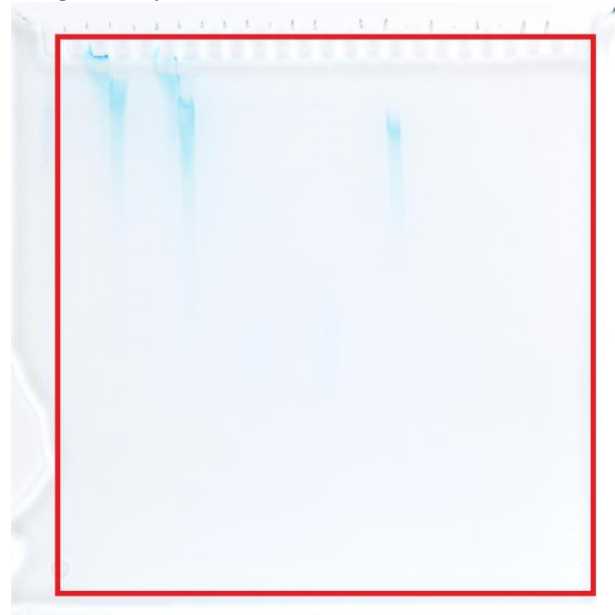

Supplement: 41589_2023_1324_MOESM7_ESM.pdf [file 41589_2023_1324_MOESM7_ESM.pdf]
