# Supplementary material for: A multi-enzyme machine polymerizes the Haemophilus influenzae type b capsule
Source: PubMed Central journal article supplement (PMC10299916; doi:10.1038/s41589-023-01324-3), 2023-06-05

Extended Data Figure 2b  
colors were adjusted equally across the entire  
image to improve the visualization of Alcian blue

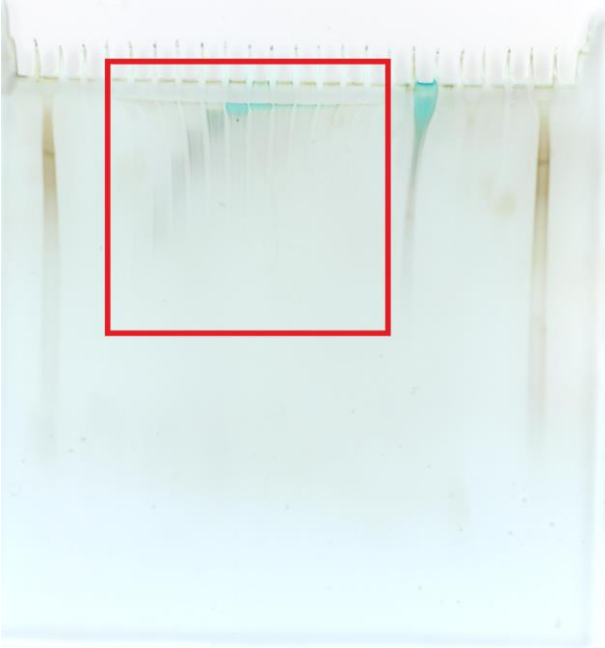

Supplement: 41589_2023_1324_MOESM8_ESM.pdf [file 41589_2023_1324_MOESM8_ESM.pdf]
