# Supplementary material for: A multi-enzyme machine polymerizes the Haemophilus influenzae type b capsule
Source: PubMed Central journal article supplement (PMC10299916; doi:10.1038/s41589-023-01324-3), 2023-06-05

Extended Data Figure 7g  
flipped in the main figure  
colors were adjusted equally across the entire  
image to improve the visualization of Alcian blue

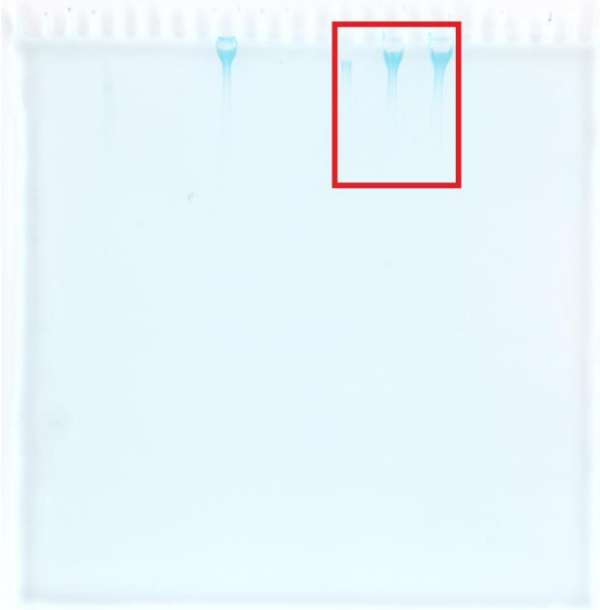

Extended Data Figure 7i  
colors were adjusted equally across the entire  
image to improve the visualization of Alcian blue

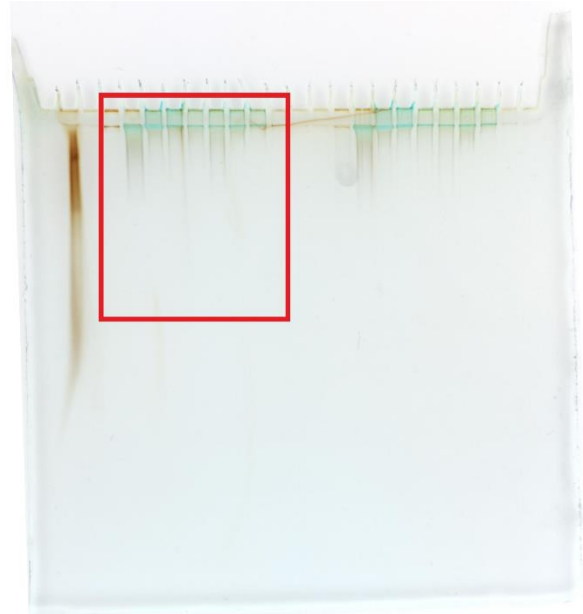

Extended Data Figure 7j  
colors were adjusted equally across the entire  
image to improve the visualization of Alcian blue

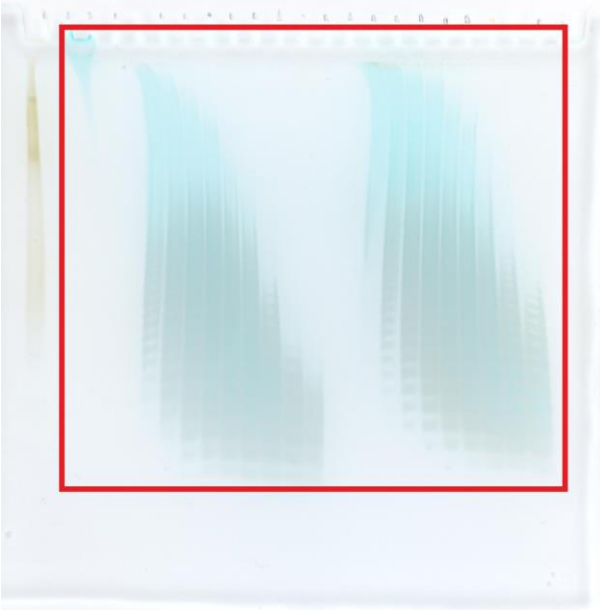

Extended Data Figure 7k  
colors were adjusted equally across the entire  
image to improve the visualization of Alcian blue

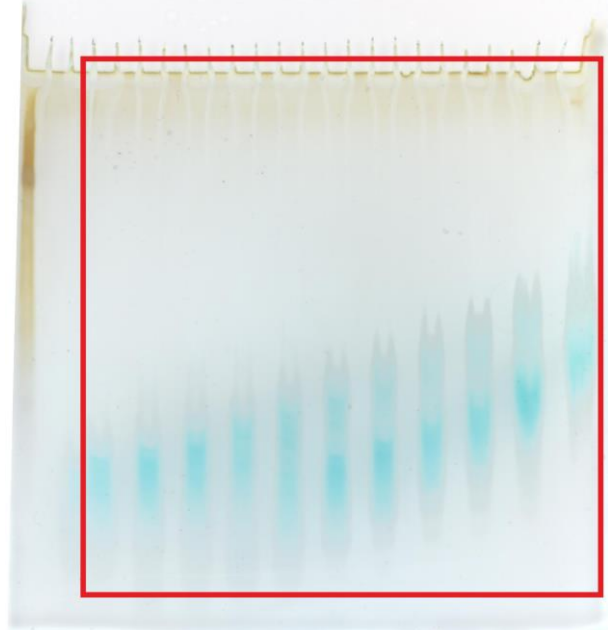

Supplement: 41589_2023_1324_MOESM9_ESM.pdf [file 41589_2023_1324_MOESM9_ESM.pdf]
