# Supplementary material for: A multi-enzyme machine polymerizes the Haemophilus influenzae type b capsule
Source: PubMed Central journal article supplement (PMC10299916; doi:10.1038/s41589-023-01324-3), 2023-06-05

Extended Data Figure 8a (red) and 8b (green) colors were adjusted equally across the entire image to improve the visualization of Alcian blue

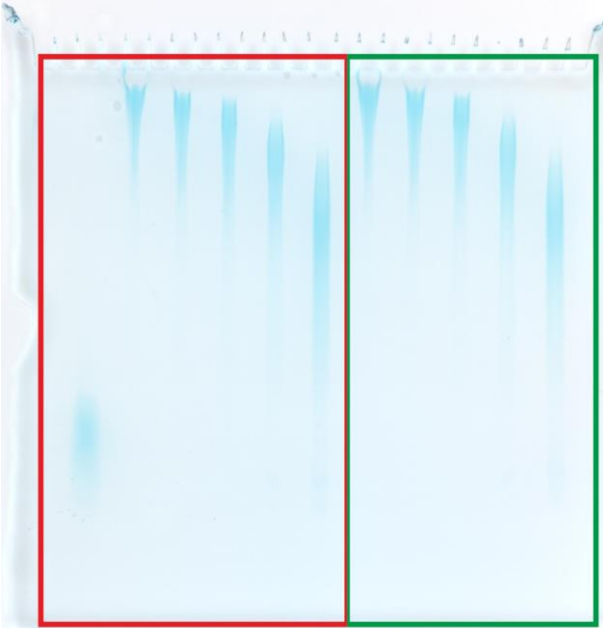

Extended Data Figure 8c colors were adjusted equally across the entire image to improve the visualization of Alcian blue

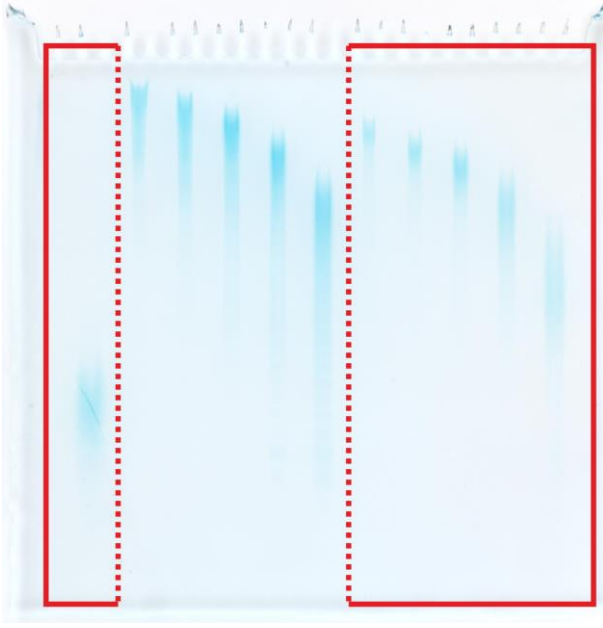

Extended Data Figure 8d colors were adjusted equally across the entire image to improve the visualization of Alcian blue

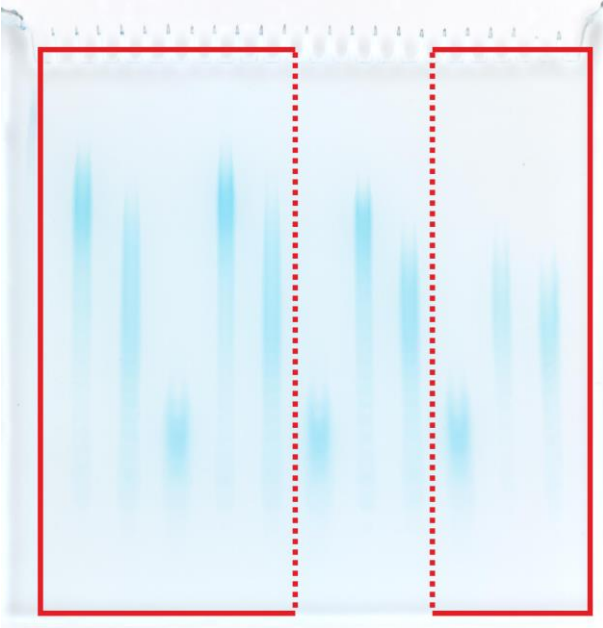

Supplement: 41589_2023_1324_MOESM10_ESM.pdf [file 41589_2023_1324_MOESM10_ESM.pdf]
